# Supplementary material for: Alkali-modified heterogeneous Pd-catalyzed synthesis of acids, amides and esters from aryl halides using formic acid as the CO precursor
Source: Royal Society of Chemistry journal article supplement (doi:10.1039/d1ra05177f), 2021-01-01

## Supplementary information

### **Alkali-modified heterogeneous Pd-catalyzed synthesis of acids, amides and esters from aryl halides using formic acid as the CO precursor**

Charles O. Oseghale, Oluwatayo Racheal Onisuru, Dele Peter Fapojuwo, Batsile M. Mogudi, Pule Petrus Molokoane, Nomathamsanqa Prudence Maqunga and Reinout Meijboom\*

Research Center for Synthesis and Catalysis, Department of Chemical Sciences, University of Johannesburg, PO Box 524, Auckland Park 2006, Johannesburg, South Africa Tel.: +27 (0)72 894 0293, Fax: +27 (0)11 559 2819  
Corresponding Author\* E-mail: rmeijboom@uj.ac.za (R.M.)

## General Considerations

Unless otherwise stated, all chemicals were purchased from Sigma-Aldrich and Associated Chemical Enterprises and used as received. The  $^1\text{H}$  NMR (500 MHz) and  $^{13}\text{C}$  NMR (125 MHz) spectra were recorded on a Bruker-500 MHz spectrometer, with reported values relative to tetramethylsilane ( $\delta$  0.0) as the internal standard. Multiplets were assigned as singlet (s), doublet (d), triplet (t), quartet (q) and double doublet (dd). Unless otherwise stated, isolated yields were determined by  $^1\text{H}$ -NMR spectroscopy and GC equipped with FID. All other measurements were performed at room temperature unless otherwise stated.

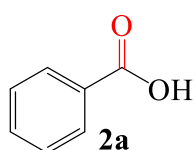

Isolated yield: 76%

$^1\text{H}$  NMR ( $\text{CDCl}_3$ , 500 MHz):  $\delta$  8.71 (dddd,  $J = 8.2, 1.7, 1.3, 0.3$  Hz, 2H), 7.57 (tt,  $J = 7.2, 1.3$  Hz, 1H), 6.42 (dddd,  $J = 8.2, 7.3, 1.2, 0.3$  Hz, 2H);  $^{13}\text{C}$  NMR ( $\text{CDCl}_3$ , 125 MHz):  $\delta$  178.2, 149.5, 146.6, 146.9, 145.8.

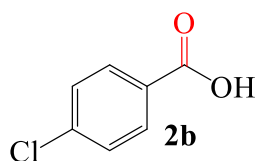

Isolated yield: 69%

$^1\text{H}$  NMR ( $\text{CDCl}_3$ , 500 MHz):  $\delta$  8.21 (ddd,  $J = 8.4, 1.3, 0.3$  Hz, 2H), 6.57 (ddd,  $J = 8.4, 1.3, 0.3$  Hz, 2H);  $^{13}\text{C}$  NMR ( $\text{CDCl}_3$ , 125 MHz):  $\delta$  178.3, 165.3, 161.2, 148.5, 143.6.

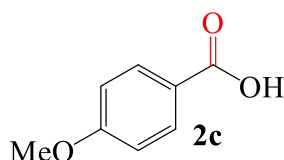

Isolated yield: 77%

$^1\text{H}$  NMR ( $\text{CDCl}_3$ , 500 MHz):  $\delta$  8.41 (dd,  $J = 8.3, 1.3$  Hz, 2H), 8.22 (dd,  $J = 8.3, 1.1$  Hz, 2H), 3.36 (s, 3H);  $^{13}\text{C}$  NMR ( $\text{CDCl}_3$ , 125 MHz):  $\delta$  178.8, 169.3, 149.2, 138.7, 136.3, 59.1, 57.2, 55.1.

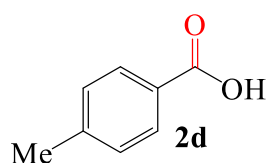

Isolated yield: 80%

$^1\text{H NMR}$  ( $\text{CDCl}_3$ , 500 MHz):  $\delta$  7.81 (dd,  $J = 8.2, 1.5$  Hz, 2H), 7.51 (dd,  $J = 8.2, 1.3$  Hz, 2H), 2.62 (s, 3H);  $^{13}\text{C NMR}$  ( $\text{CDCl}_3$ , 125 MHz):  $\delta$  173.5, 142.4, 141.7, 138.2, 22.6, 16.9.

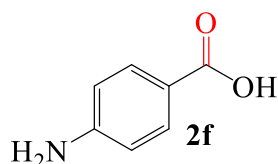

Isolated yield: 55%

$^1\text{H NMR}$  ( $\text{CDCl}_3$ , 500 MHz):  $\delta$  8.28 (dd,  $J = 8.2, 1.5$  Hz, 2H), 7.21 (dd,  $J = 8.2, 1.3$  Hz, 2H), 2.46 (s, 3H);  $^{13}\text{C NMR}$  ( $\text{CDCl}_3$ , 125 MHz):  $\delta$  175.2, 157.9, 153.4, 143.5, 35.9.

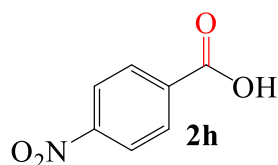

Isolated yield: 66%

$^1\text{H NMR}$  ( $\text{CDCl}_3$ , 500 MHz):  $\delta$  7.35 (dd,  $J = 8.2, 1.5$  Hz, 2H), 7.24 (dd,  $J = 8.2, 1.3$  Hz, 2H), 2.52 (s, 3H);  $^{13}\text{C NMR}$  ( $\text{CDCl}_3$ , 125 MHz):  $\delta$  177.9, 159.4, 157.2, 143.6, 122.3, 118.5, 39.3.

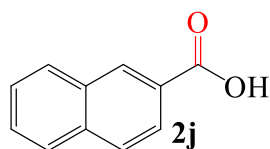

Isolated yield: 74%

$^1\text{H NMR}$  ( $\text{CDCl}_3$ , 500 MHz):  $\delta$  7.71 (ddq,  $J = 2.0, 1.7, 0.4$  Hz, 1H), 7.40-7.46 (dddt,  $J = 7.5, 1.7, 1.6, 0.4$  Hz, 2H), 7.23 (ddd,  $J = 8.3, 2.0, 0.4$  Hz, 2H), 7.06-7.18 (dddd,  $J = 7.5, 6.9, 2.5, 0.4$  Hz, 2H);  $^{13}\text{C NMR}$  ( $\text{CDCl}_3$ , 125 MHz):  $\delta$  176.3, 144.5, 143.2, 137.6, 136.7, 114.7.

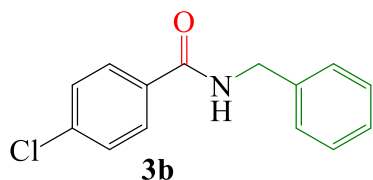

Isolated yield: 22%

$^1\text{H}$  NMR ( $\text{CDCl}_3$ , 500 MHz):  $\delta$  8.45 (ddd,  $J = 8.4, 1.7, 0.4$  Hz, 2H), 8.27 (ddd,  $J = 8.4, 1.2, 0.4$  Hz, 2H), 7.67-7.84 (dddd,  $J = 7.3, 1.2, 1.0, 0.4$  Hz, 5H, tdd,  $J = 7.4, 1.7, 0.4$  Hz), 4.18 (s, 2H);  $^{13}\text{C}$  NMR ( $\text{CDCl}_3$ , 125 MHz):  $\delta$  176.6, 148.1, 141.3, 134.3, 132.7, 40.2.

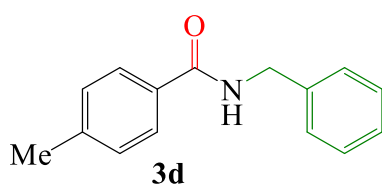

Isolated yield: 43%

$^1\text{H}$  NMR ( $\text{CDCl}_3$ , 500 MHz):  $\delta$  8.17 (ddd,  $J = 8.2, 1.6, 0.4$  Hz, 2H), 7.53-7.75 (dddd,  $J = 7.3, 1.2, 1.0, 0.4$  Hz, 5H, tdd,  $J = 7.4, 1.7, 0.4$  Hz, tt,  $J = 7.3, 1.2$  Hz), 2.47 (s, 3H);  $^{13}\text{C}$  NMR ( $\text{CDCl}_3$ , 125 MHz):  $\delta$  174.1, 146.7, 141.2, 138.1, 132.1, 129.1, 58.2, 31.3.

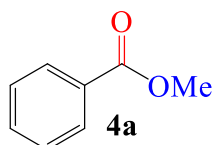

Isolated yield: 48%

$^1\text{H}$  NMR ( $\text{CDCl}_3$ , 500 MHz):  $\delta$  8.74 (dddd,  $J = 8.2, 1.7, 1.3, 0.2$  Hz, 2H), 7.72 (tt,  $J = 7.3, 1.2$  Hz, 1H), 7.43 (dddd,  $J = 8.2, 7.0, 1.2, 0.3$  Hz, 2H), 4.18 (s, 3H);  $^{13}\text{C}$  NMR ( $\text{CDCl}_3$ , 125 MHz):  $\delta$  174.5, 130.3, 52.5.

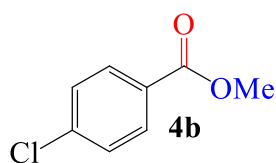

Isolated yield: 35%

$^1\text{H}$  NMR ( $\text{CDCl}_3$ , 500 MHz):  $\delta$  7.64 (dd,  $J = 8.2, 1.3$  Hz, 2H), 7.37 (dd,  $J = 8.2, 1.3$  Hz, 2H), 3.76 (s, 3H);  $^{13}\text{C}$  NMR ( $\text{CDCl}_3$ , 125 MHz):  $\delta$  172.3, 162.3, 132.9, 130.8, 56.4.

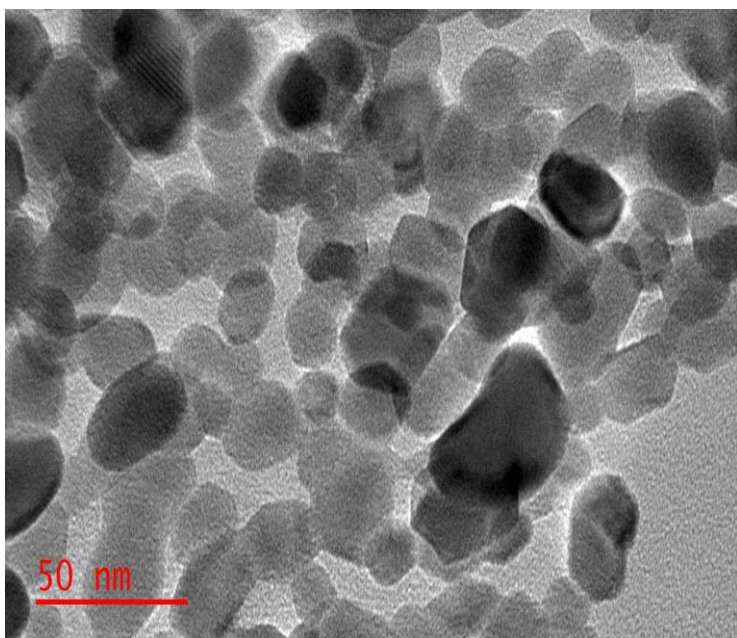

**Fig. S1** TEM image of Co<sub>3</sub>O<sub>4</sub>.

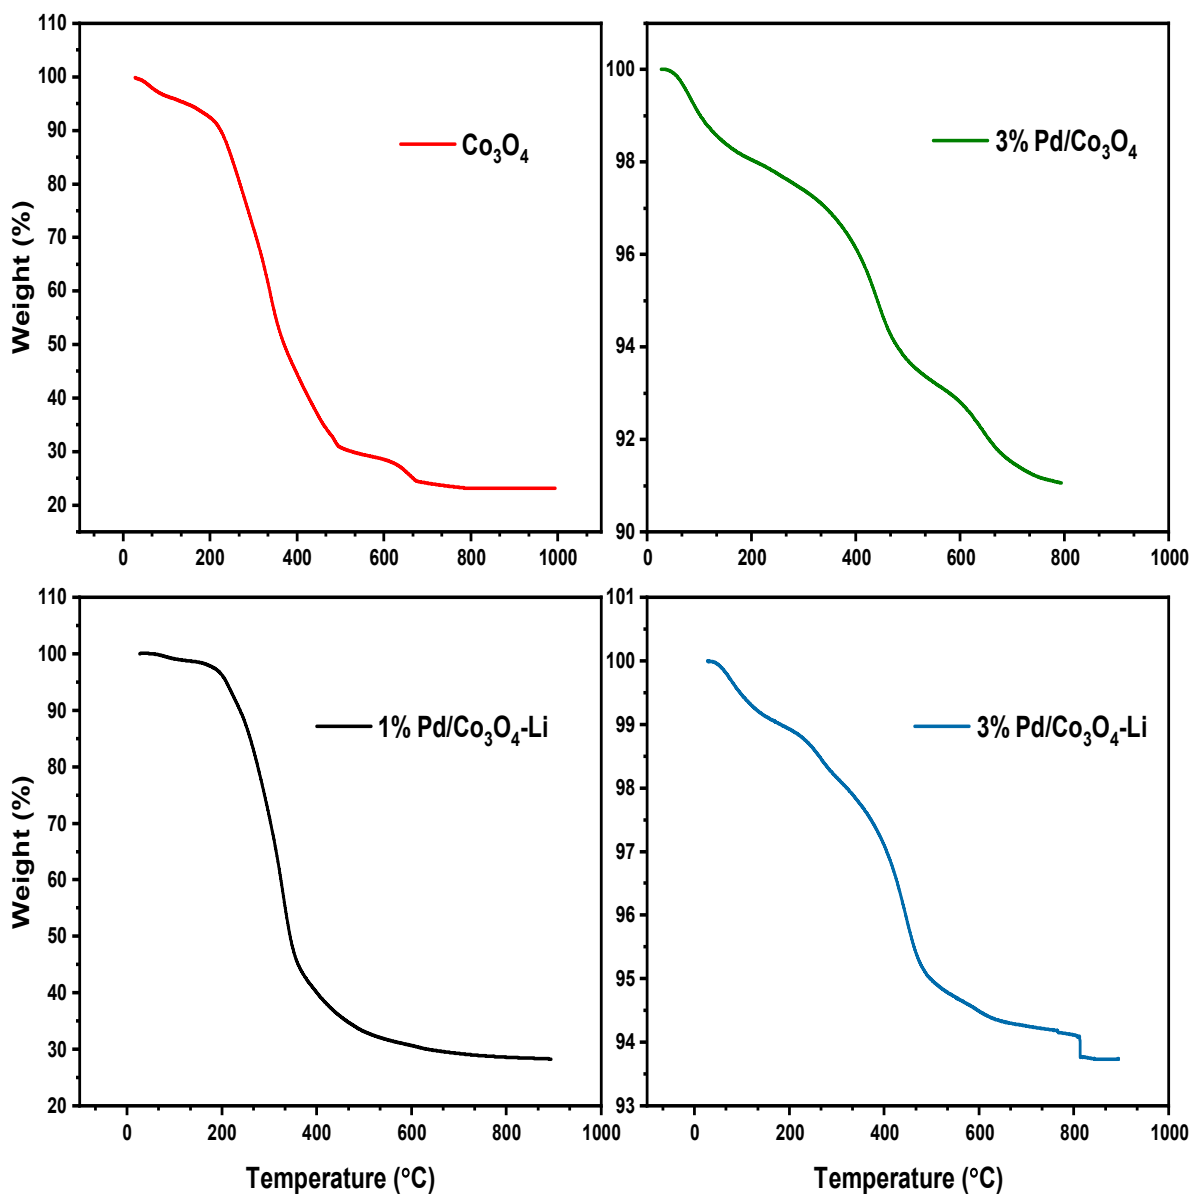

Fig. S2 TGA spectra of the catalyst.

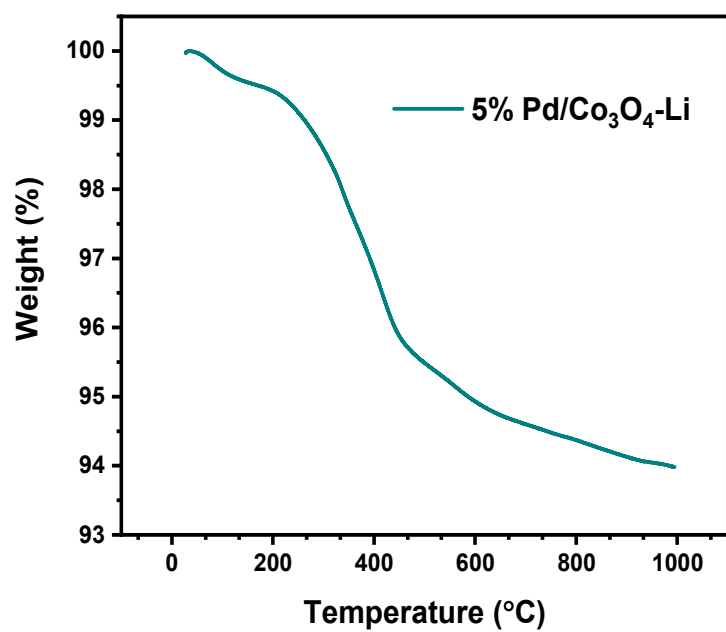

**Fig. S3** TGA spectra of the catalyst.

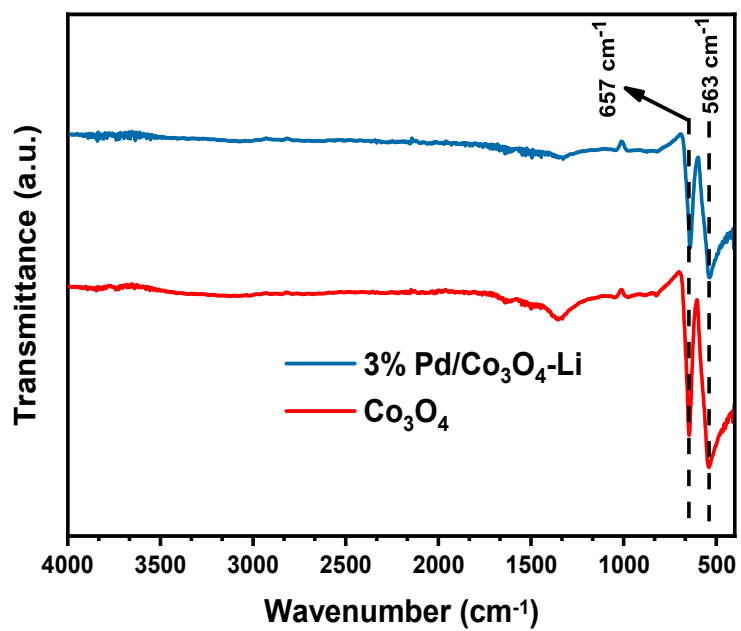

Fig. S4 FT-IR spectra of the catalyst.



Lab name: SRI Instruments  
 Client: Valued Customer  
 Client ID: N2024  
 Analysis date: 07/22/2021 11:19:04  
 Method: Syringe Injection  
 Description: TCD  
 Column: RESTEK 15METER MXT-1  
 Carrier: HELIUM AT 5 PSI  
 Integration: Peak sens=95.0 Base sens=60.0 Min area= 100.00 Standard= 1.00  
 Data file: TCD Day 35.CHR ()  
 Sample: RUN1  
 Comments: TYPE YOUR COMMENTS HERE  
 Temperature program:

| Init temp | Hold  | Ramp   | Final temp |
|-----------|-------|--------|------------|
| 50.00     | 4.000 | 20.000 | 270.00     |

Events:

| Time  | Event               |
|-------|---------------------|
| 0.000 | ZERO                |
| 0.000 | D ON ()             |
| 0.200 | G ON (ValveRotate)  |
| 7.000 | G OFF (ValveRotate) |

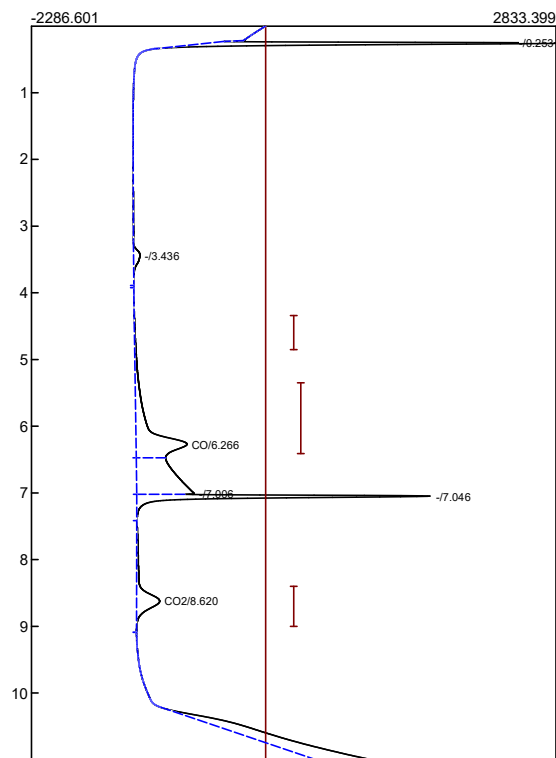

| Component | Retention   | Area       | External | Units |
|-----------|-------------|------------|----------|-------|
| -         | 0.253       | 8269.2390  | 0.0000   |       |
| -         | 3.436       | 870.0432   | 0.0000   |       |
| CO        | 6.266       | 12346.9760 | 0.0000   |       |
| -         | 7.006       | 13301.0690 | 0.0000   |       |
| -         | 7.046       | 8731.7305  | 0.0000   |       |
| CO2       | 8.620       | 4385.0413  | 0.0000   |       |
| -         | 11.786      | 87393.3334 | 0.0000   |       |
| -         | 12.206      | 1008.1385  | 0.0000   |       |
| -         | 12.246      | 2999.0468  | 0.0000   |       |
| -         | 12.400      | 932.3788   | 0.0000   |       |
| -         | 12.453      | 746.6624   | 0.0000   |       |
| -         | 12.506      | 774.3698   | 0.0000   |       |
| -         | 12.546      | 1115.5744  | 0.0000   |       |
| -         | 12.656      | 984.7073   | 0.0000   |       |
| -         | 12.743      | 426.5450   | 0.0000   |       |
| -         | 12.793      | 208.1639   | 0.0000   |       |
| -         | 12.846      | 181.6432   | 0.0000   |       |
| -         | 12.890      | 190.6934   | 0.0000   |       |
| -         | 144865.3559 | 0.0000     |          |       |

Lab name: SRI Instruments  
 Client: Valued Customer  
 Client ID: N2024  
 Analysis date: 07/22/2021 11:19:04  
 Method: Syringe Injection  
 Description: TCD  
 Column: RESTEK 15METER MXT-1  
 Carrier: HELIUM AT 5 PSI  
 Integration: Peak sens=95.0 Base sens=60.0 Min area= 10.00 Standard= 1.000  
 Data file: TCD Day 35.CHR ()  
 Sample: RUN1  
 Comments: TYPE YOUR COMMENTS HERE  
 Temperature program:

| Init temp | Hold  | Ramp   | Final temp |
|-----------|-------|--------|------------|
| 50.00     | 4.000 | 20.000 | 270.00     |

Events:

| Time  | Event           |
|-------|-----------------|
| 0.000 | ZERO            |
| 1.000 | INTEG IMMEDIATE |
| 7.000 | INTEG IMMEDIATE |

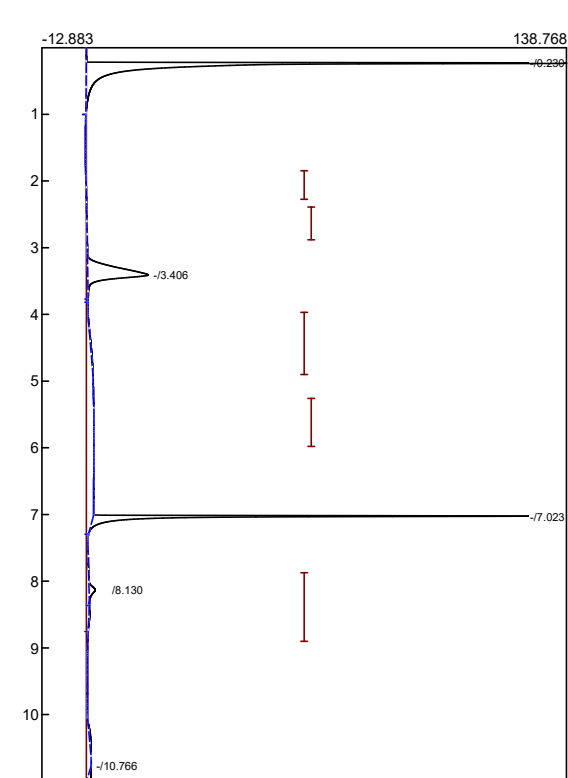

| Retention | Area     | External | Units |
|-----------|----------|----------|-------|
| 0.230     | 432.7396 | 0.0000   |       |
| 3.406     | 185.2294 | 0.0000   |       |
| 7.023     | 203.3418 | 0.0000   |       |
| 8.130     | 15.3680  | 0.0000   |       |
| 10.766    | 299.5242 | 0.0000   |       |
| 1136.2030 |          | 0.0000   |       |

**Fig. S5** GC-TCD spectra of the HCOOH decomposition. Reaction conditions: **B**<sub>1</sub> (1 equiv.), **X**\* (0.5 g), HCOOH (3 mL), Me-THF (3 mL), 110-130 °C and 16 h.

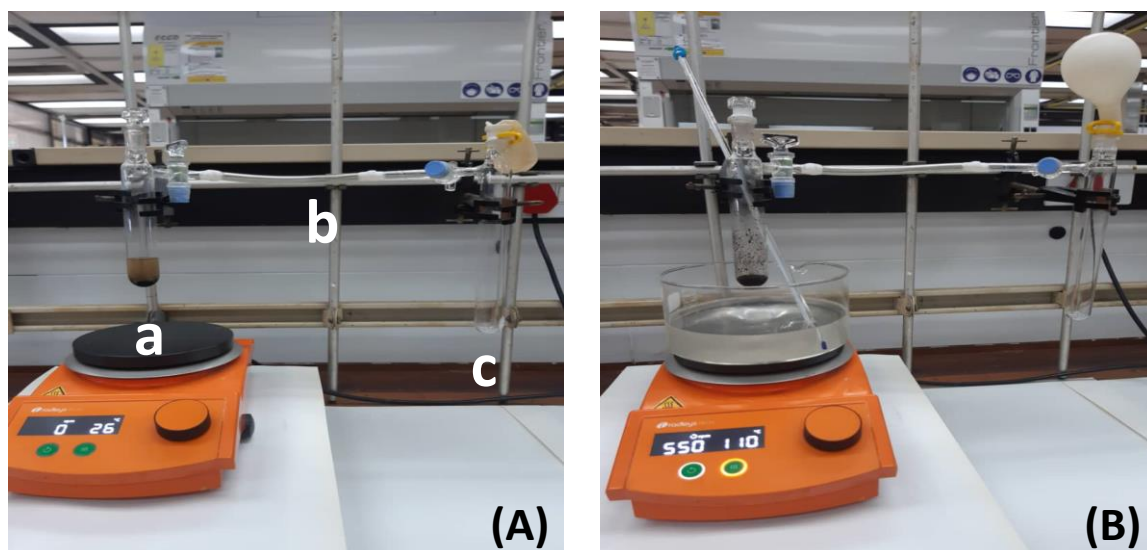

**Fig. S6** 3% Pd/Co<sub>3</sub>O<sub>4</sub>-Li catalyzed carbonylation reaction with formic acid in an open system experiment to show the formation of CO. Reaction conditions: Room temperature with all reactants in place (A), and 110-130 °C, 12-16 h (B). The inflated balloon in (B) shows the evidence of the CO release.

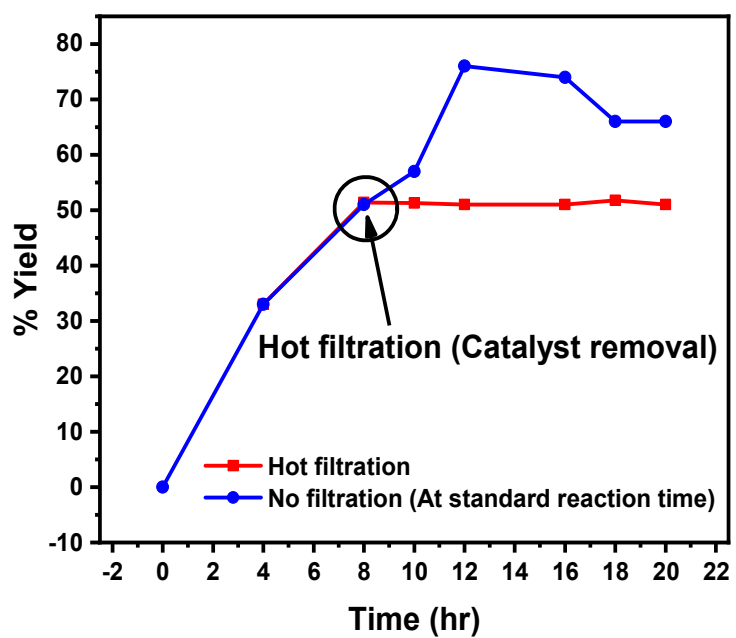

**Fig. S7** Hot filtration test for the 3% Pd/Co<sub>3</sub>O<sub>4</sub>-Li catalyst.

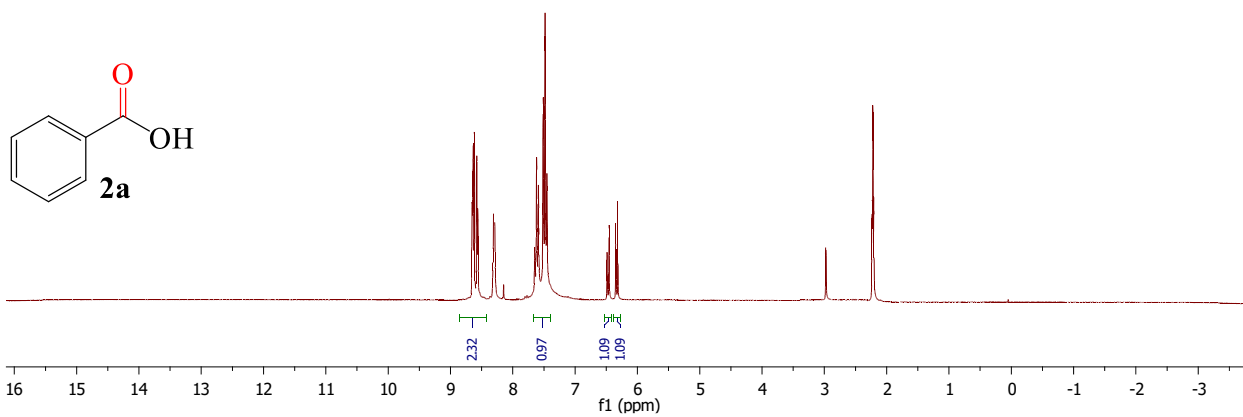

8.74  
8.73  
8.71  
8.67  
8.65  
7.63  
7.59  
7.58  
7.56  
6.47  
6.44  
6.33  
6.30

— 2.31

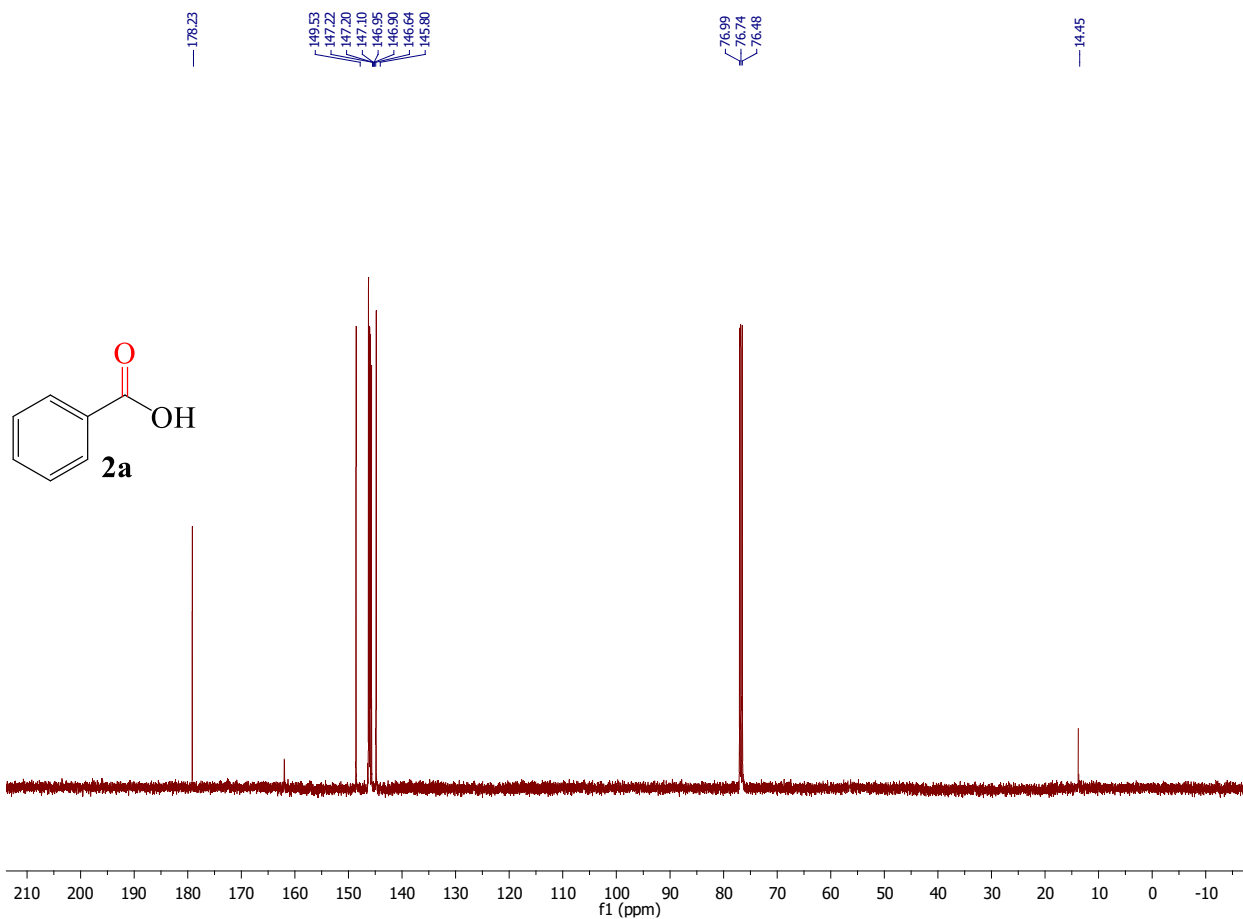

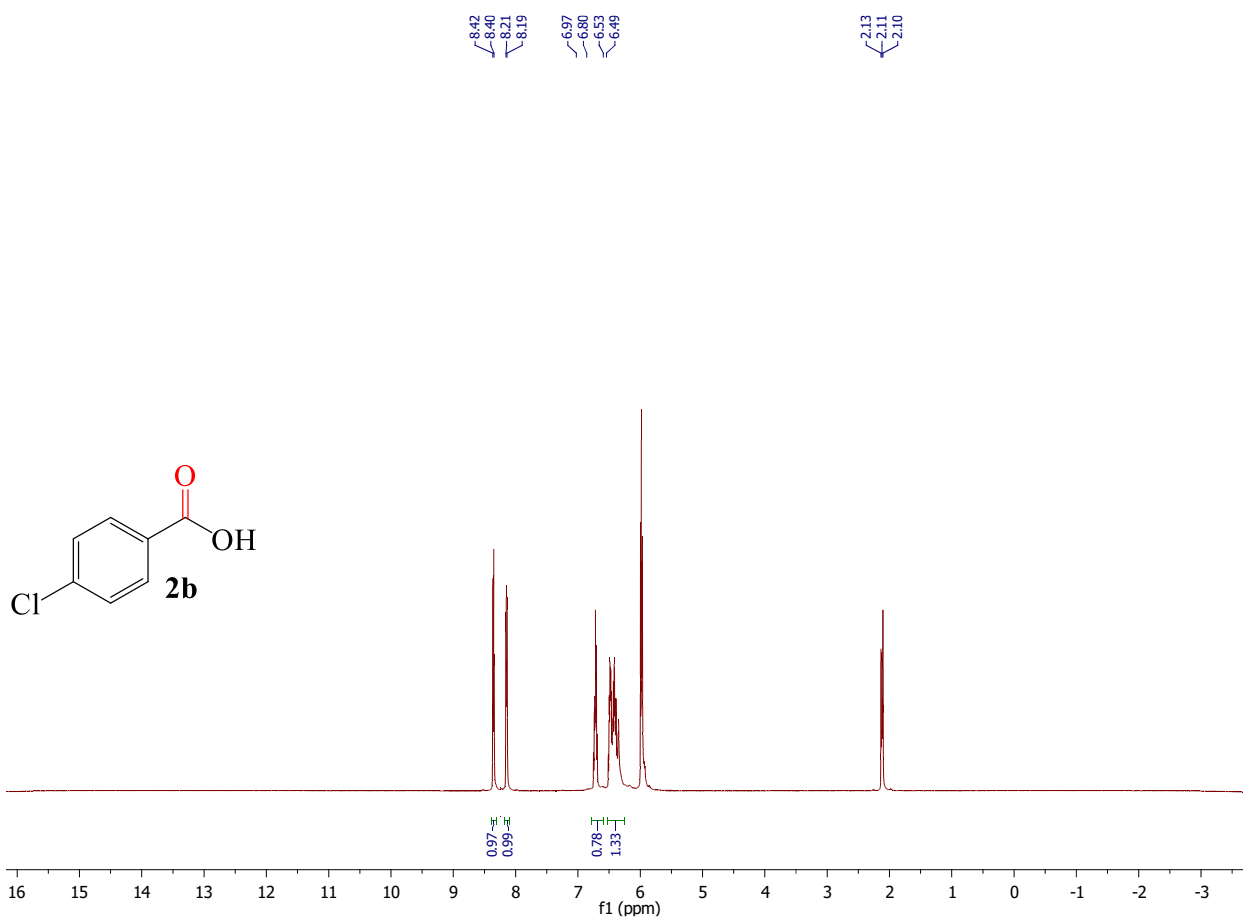

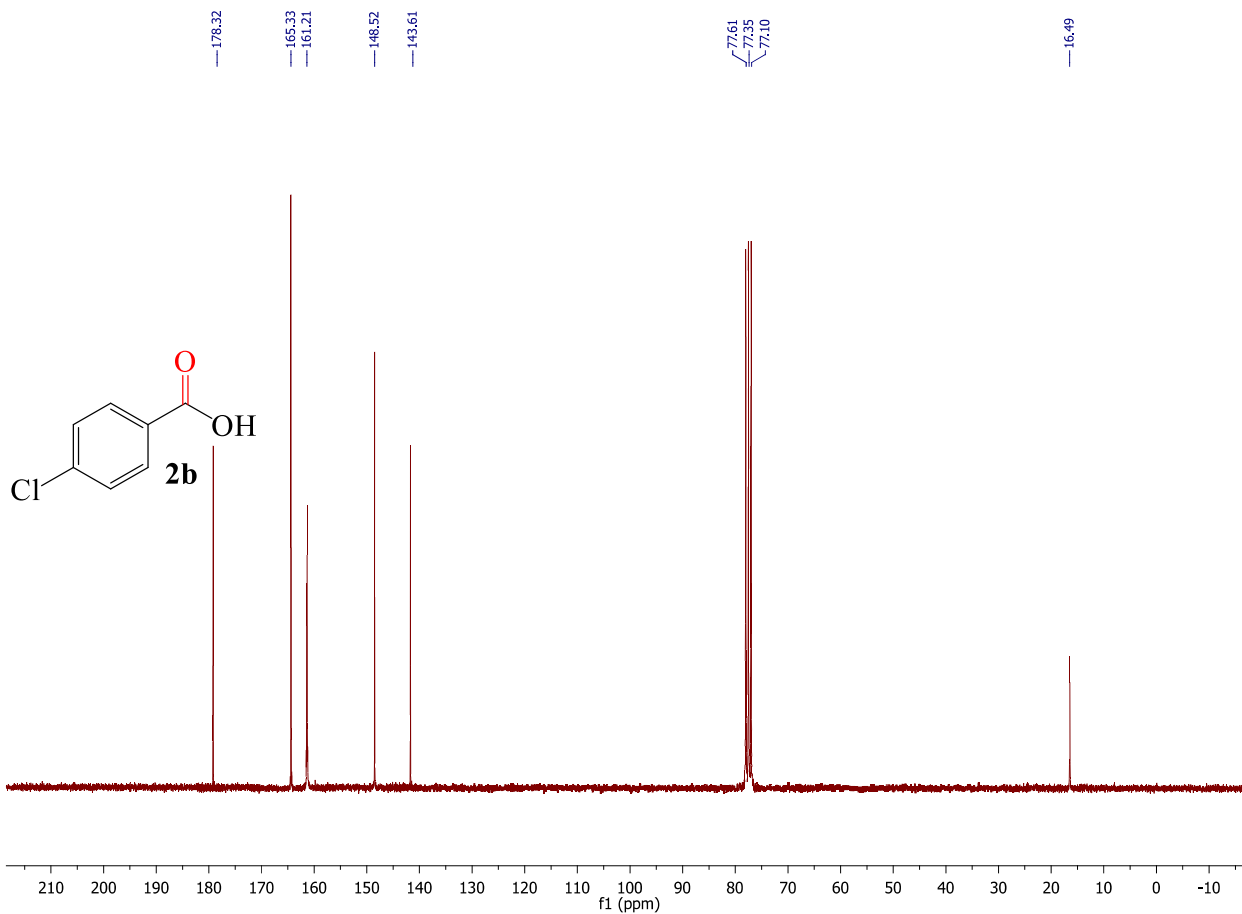

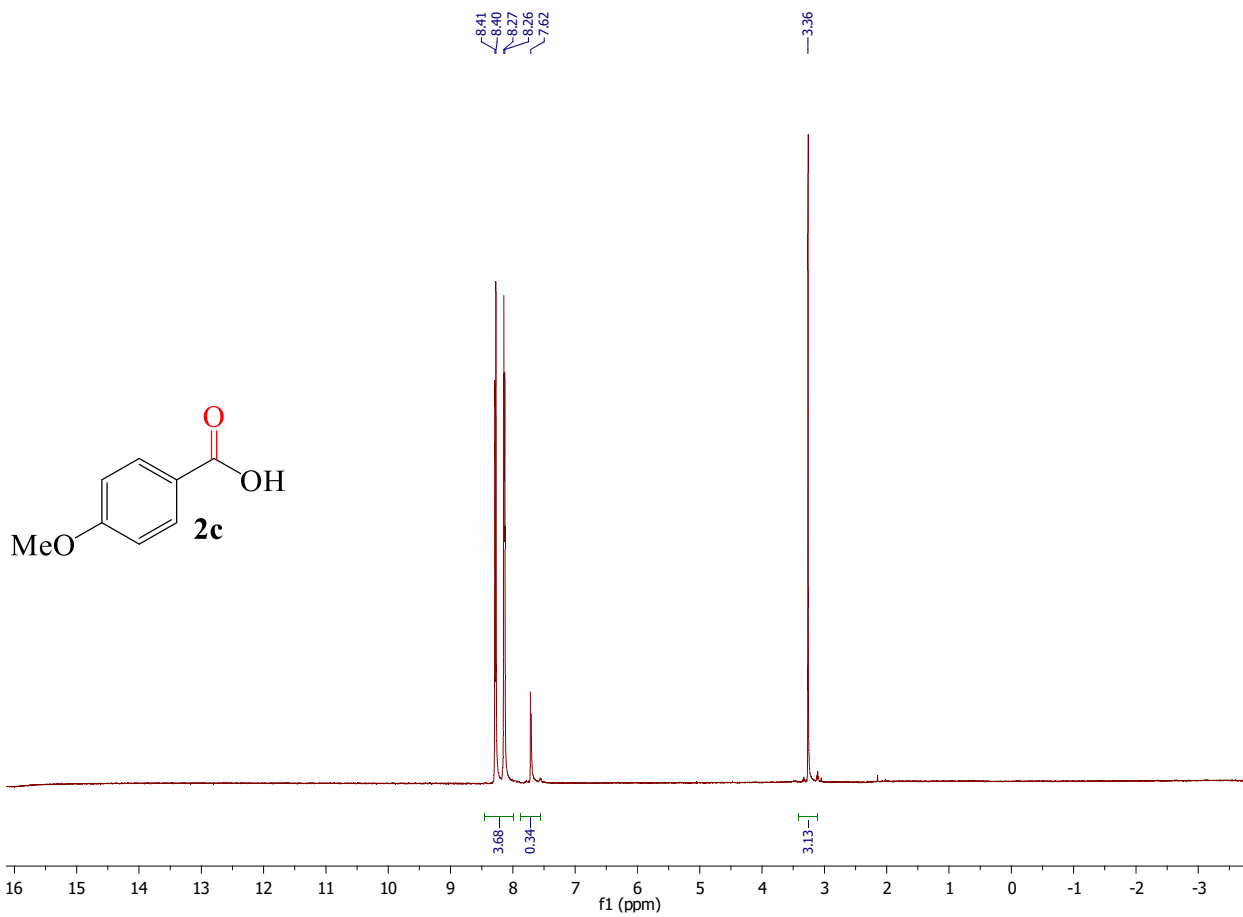



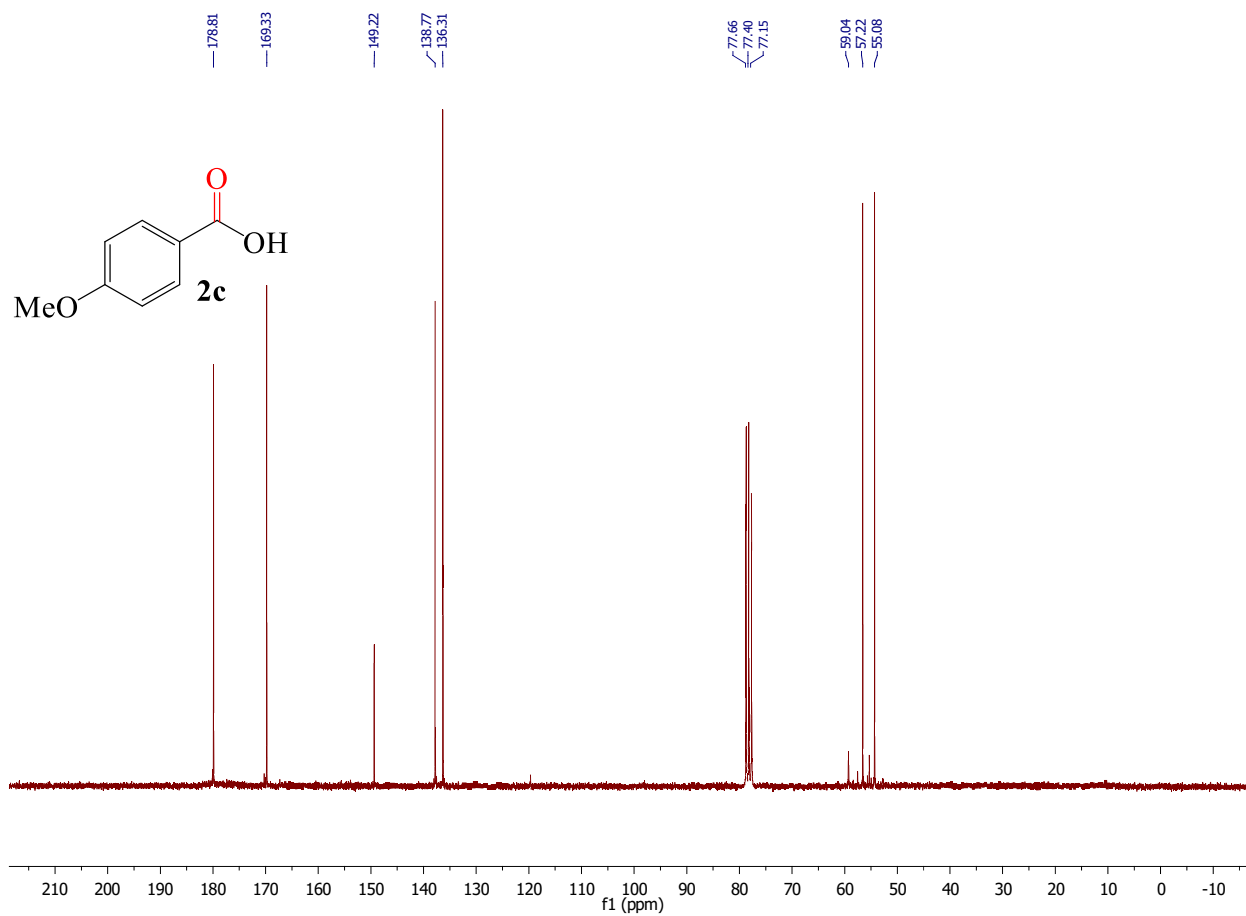

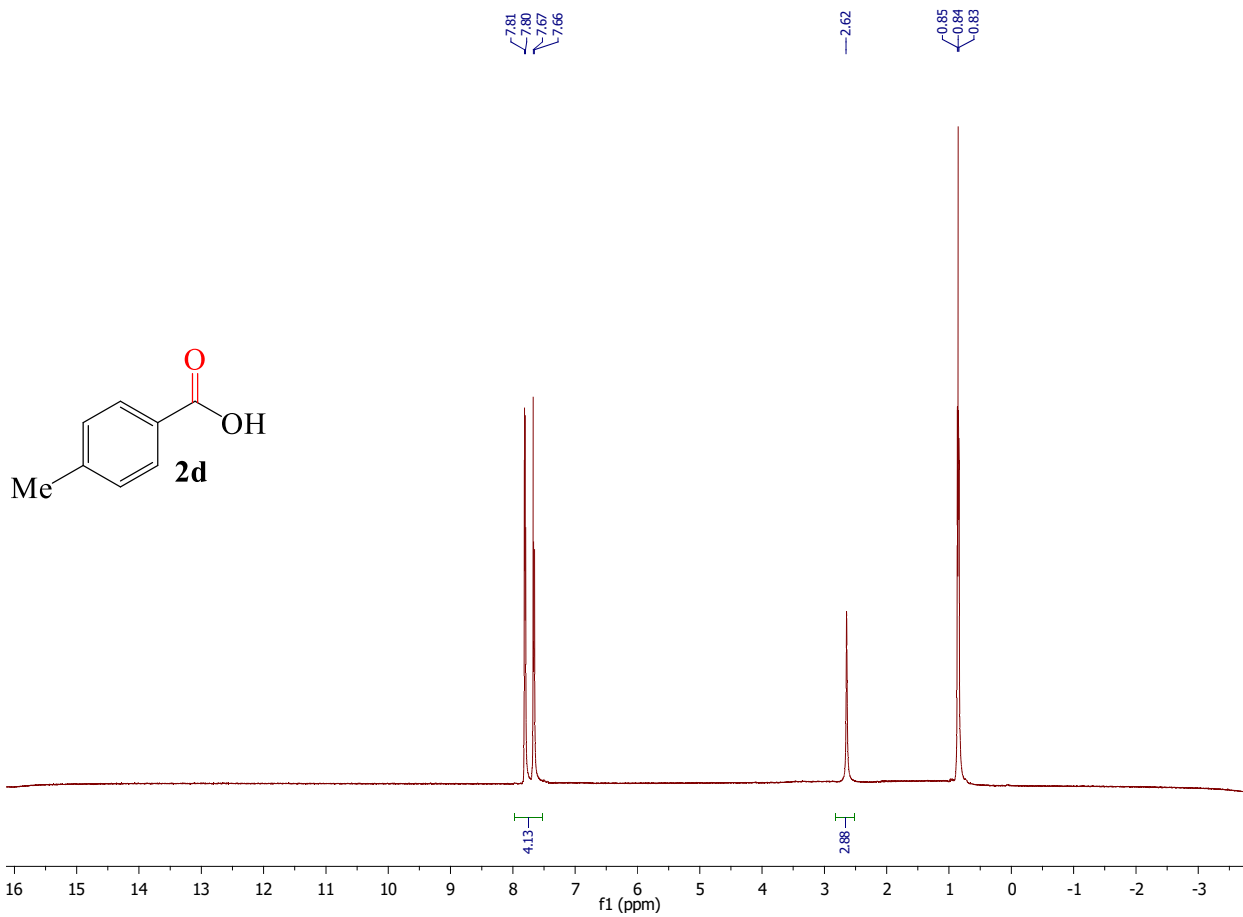

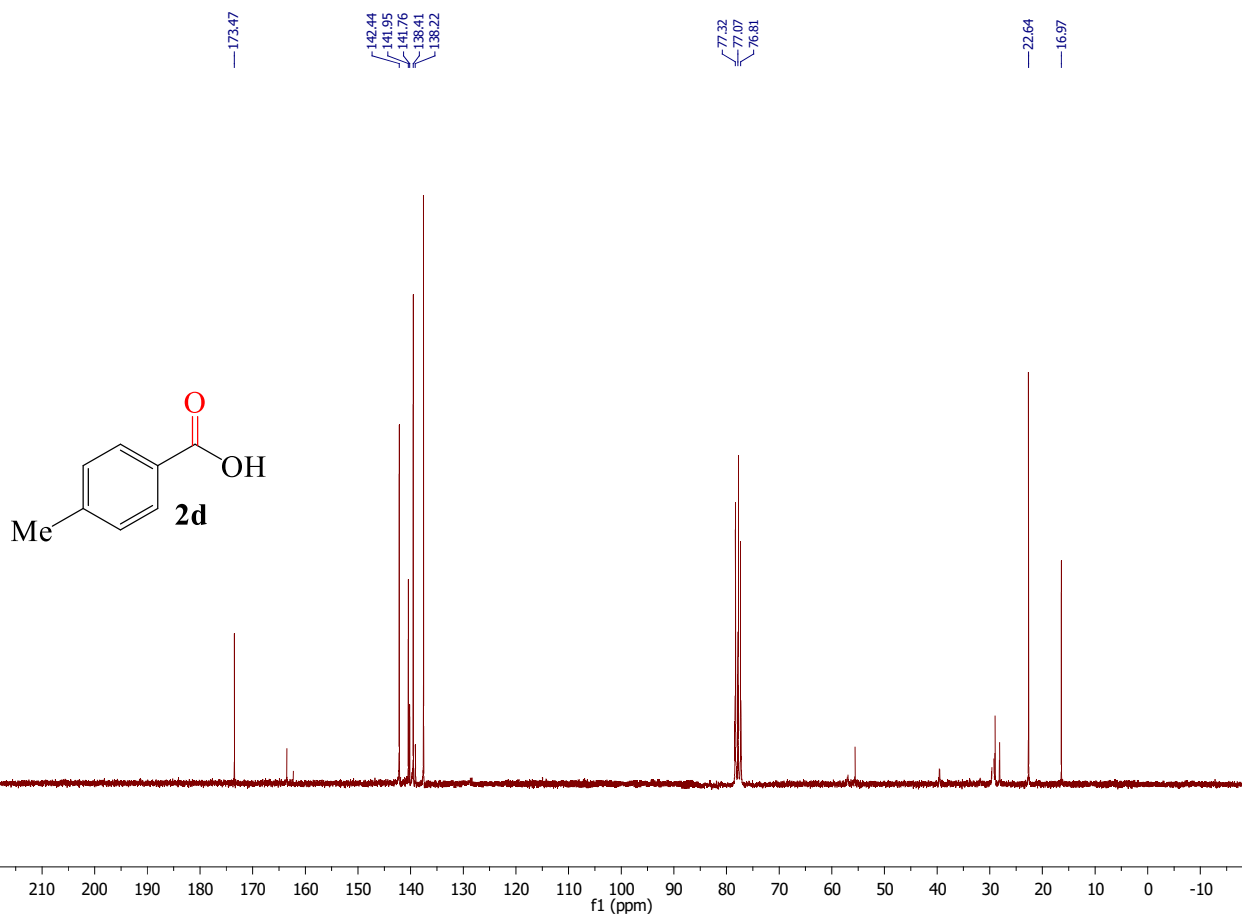

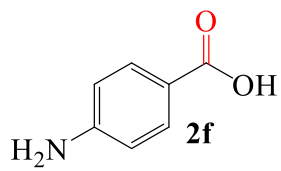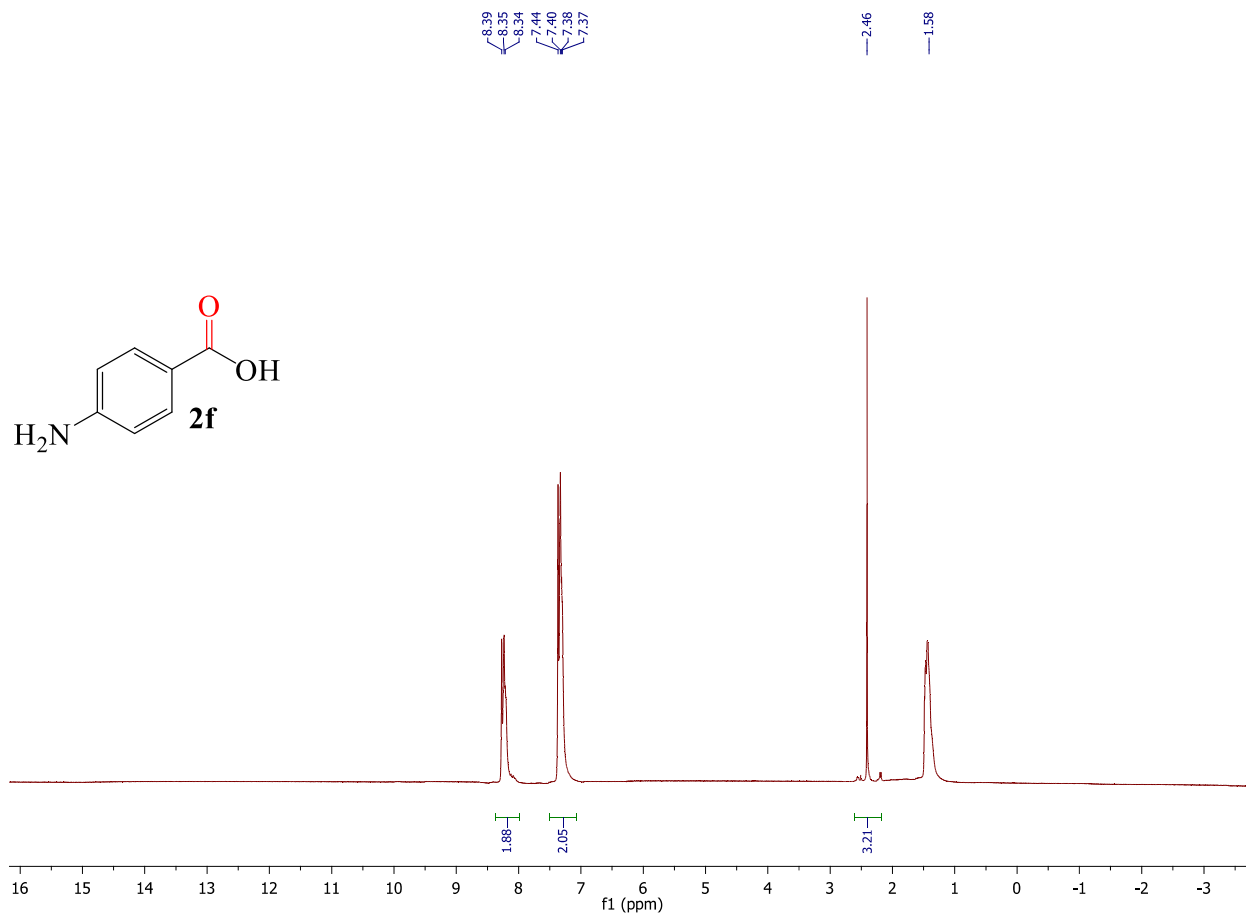

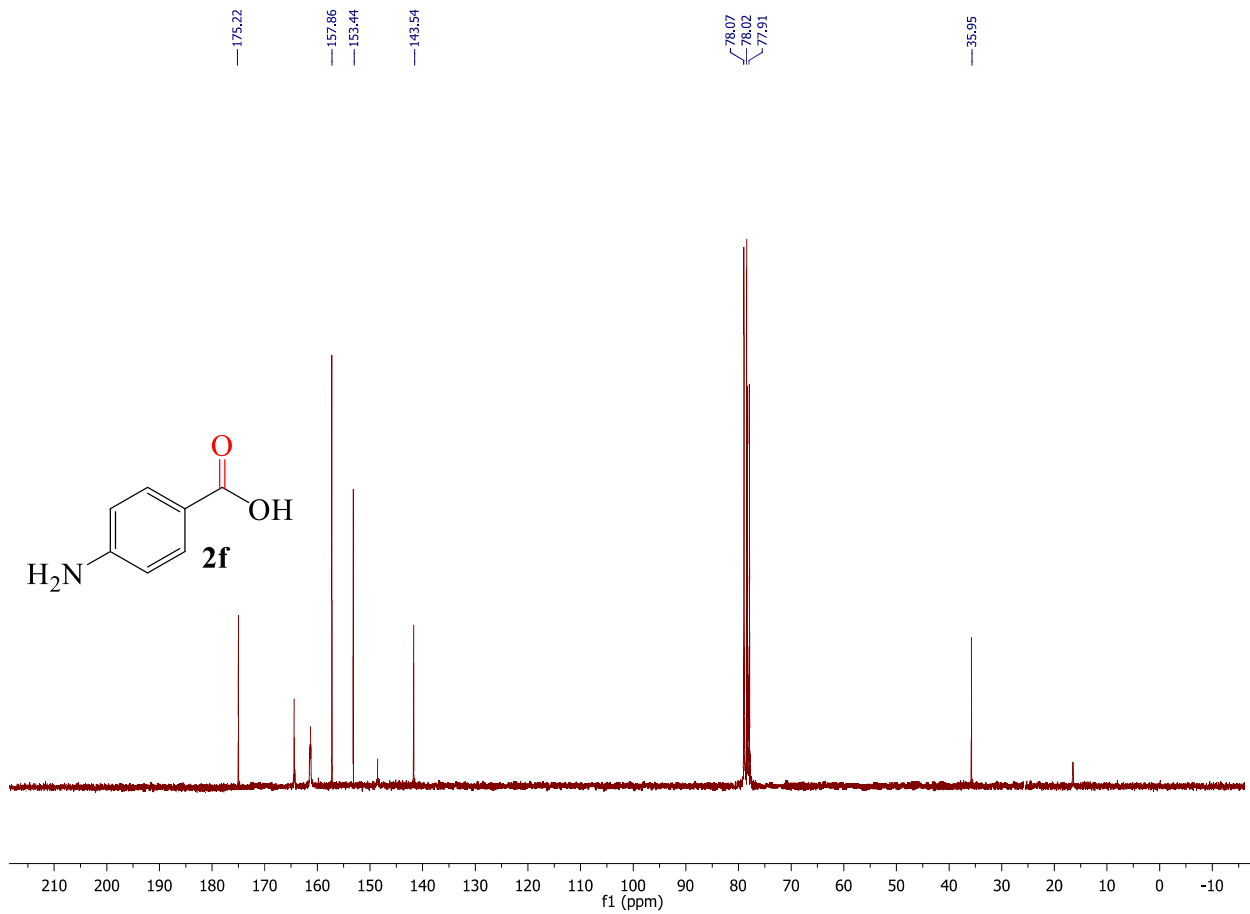

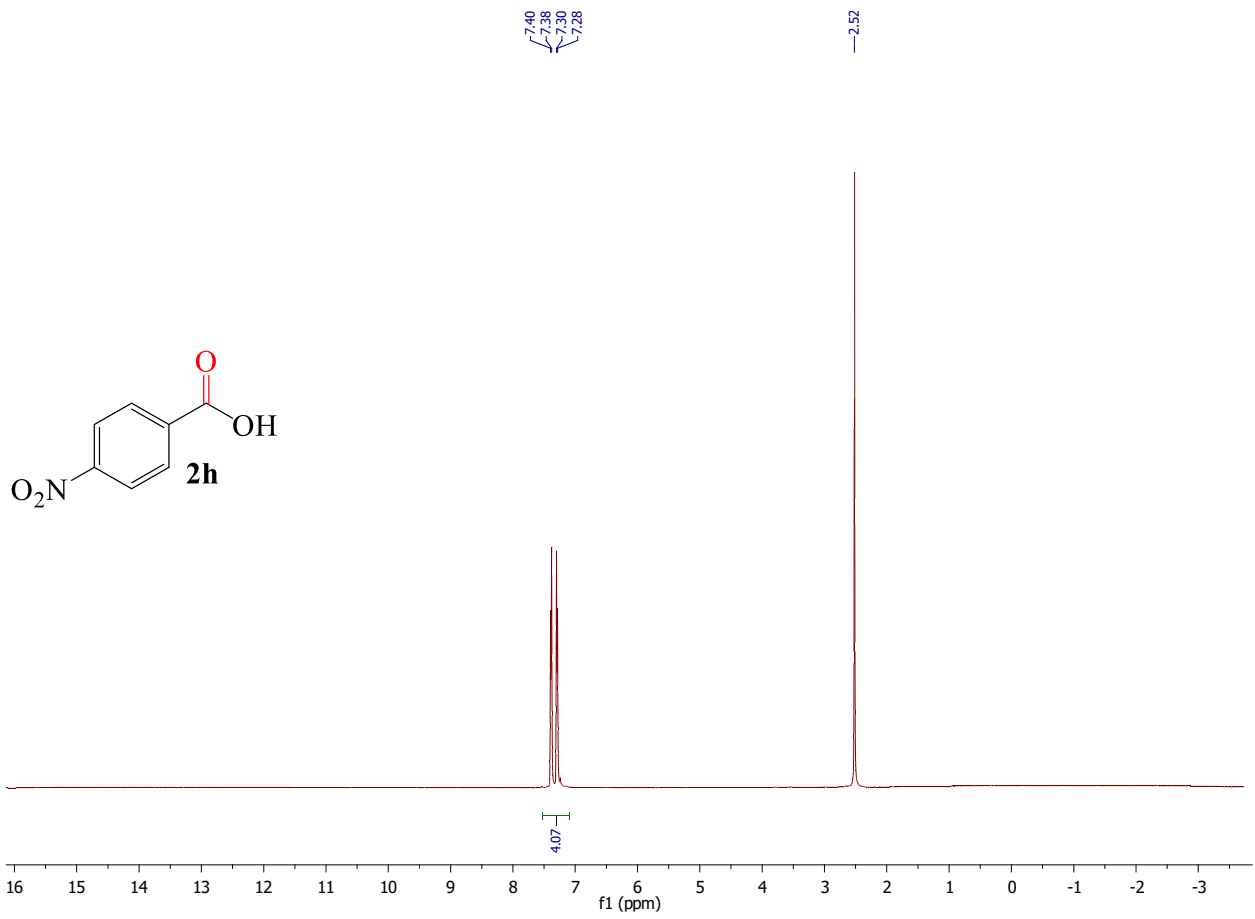

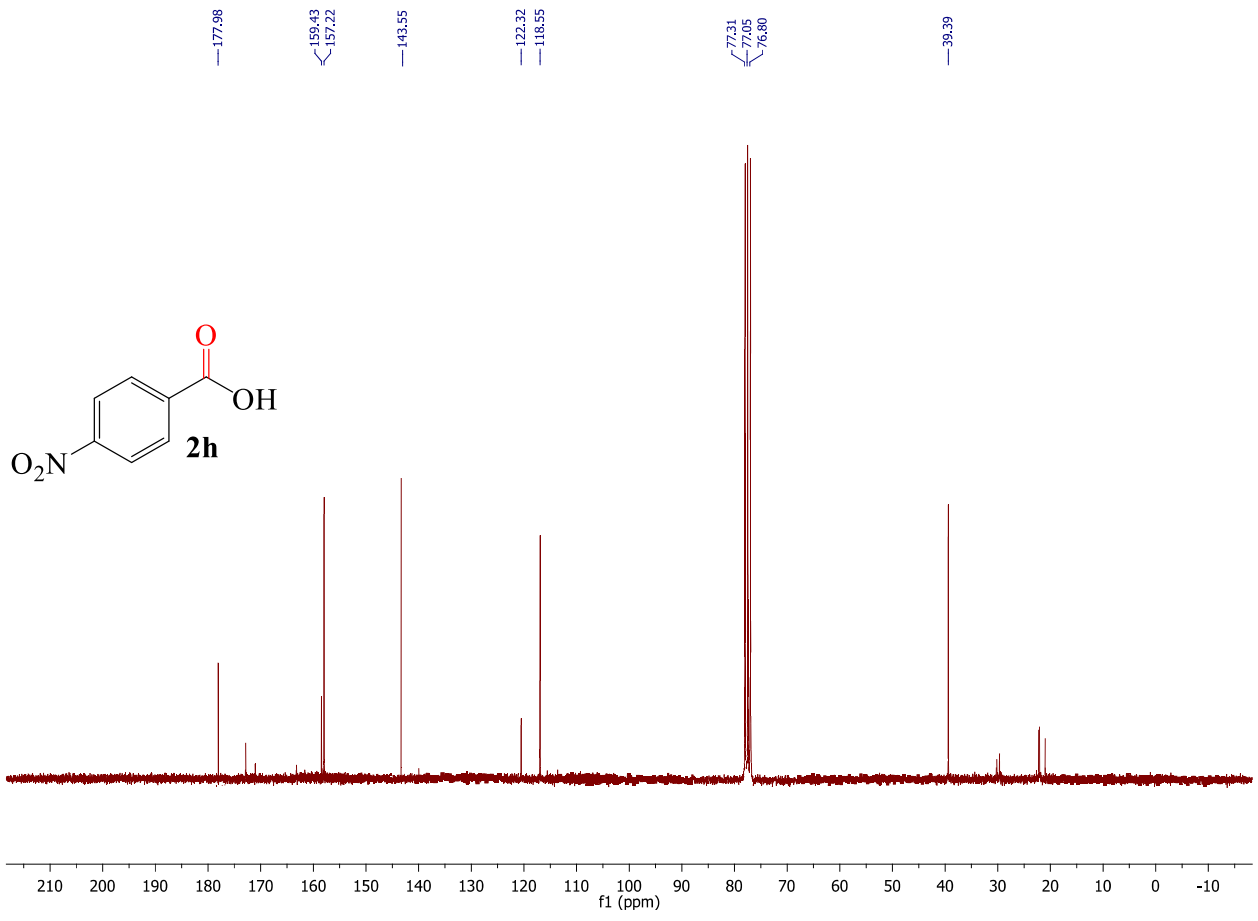

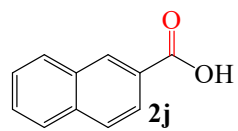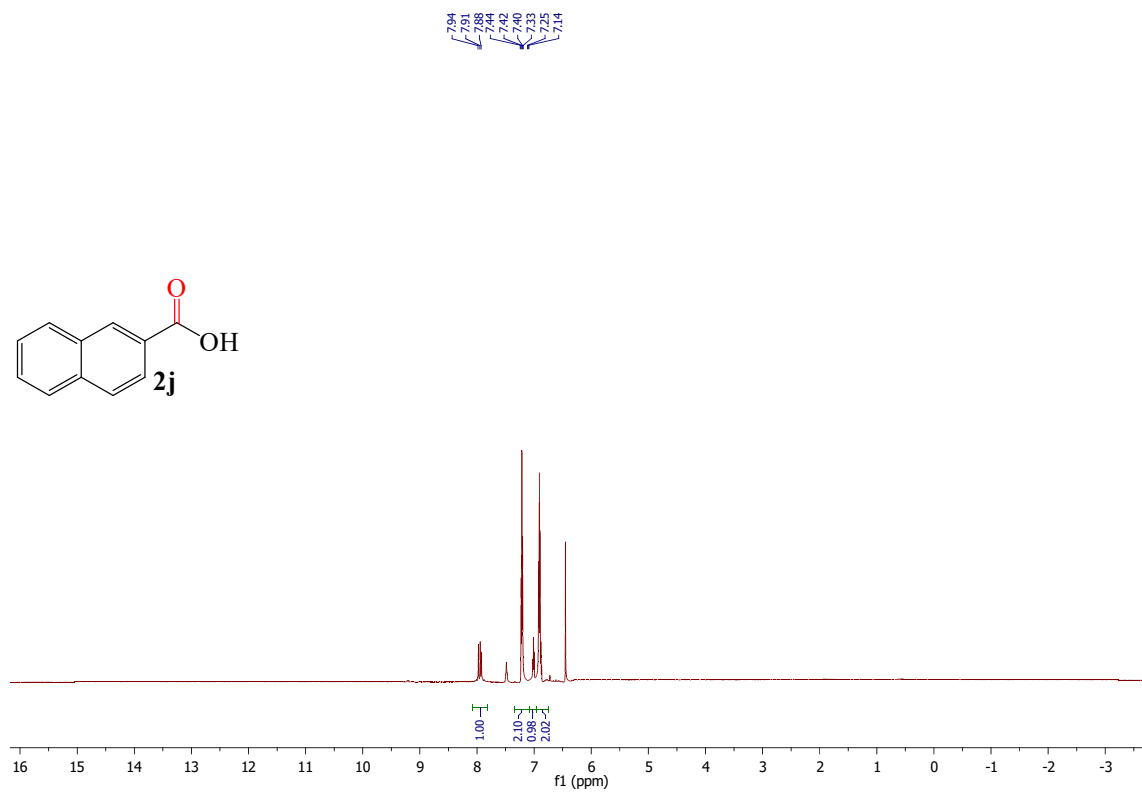



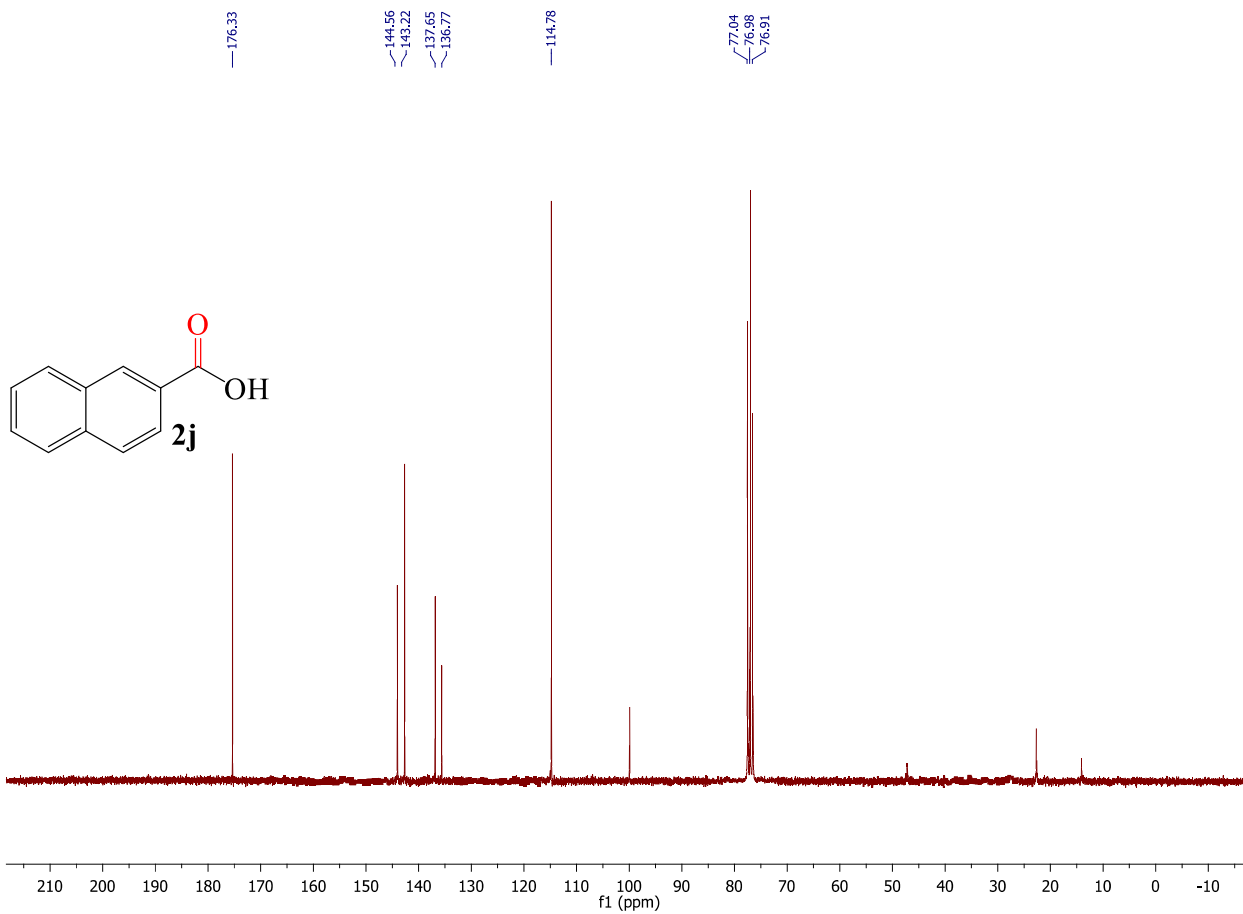

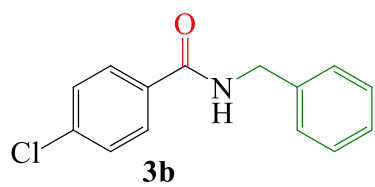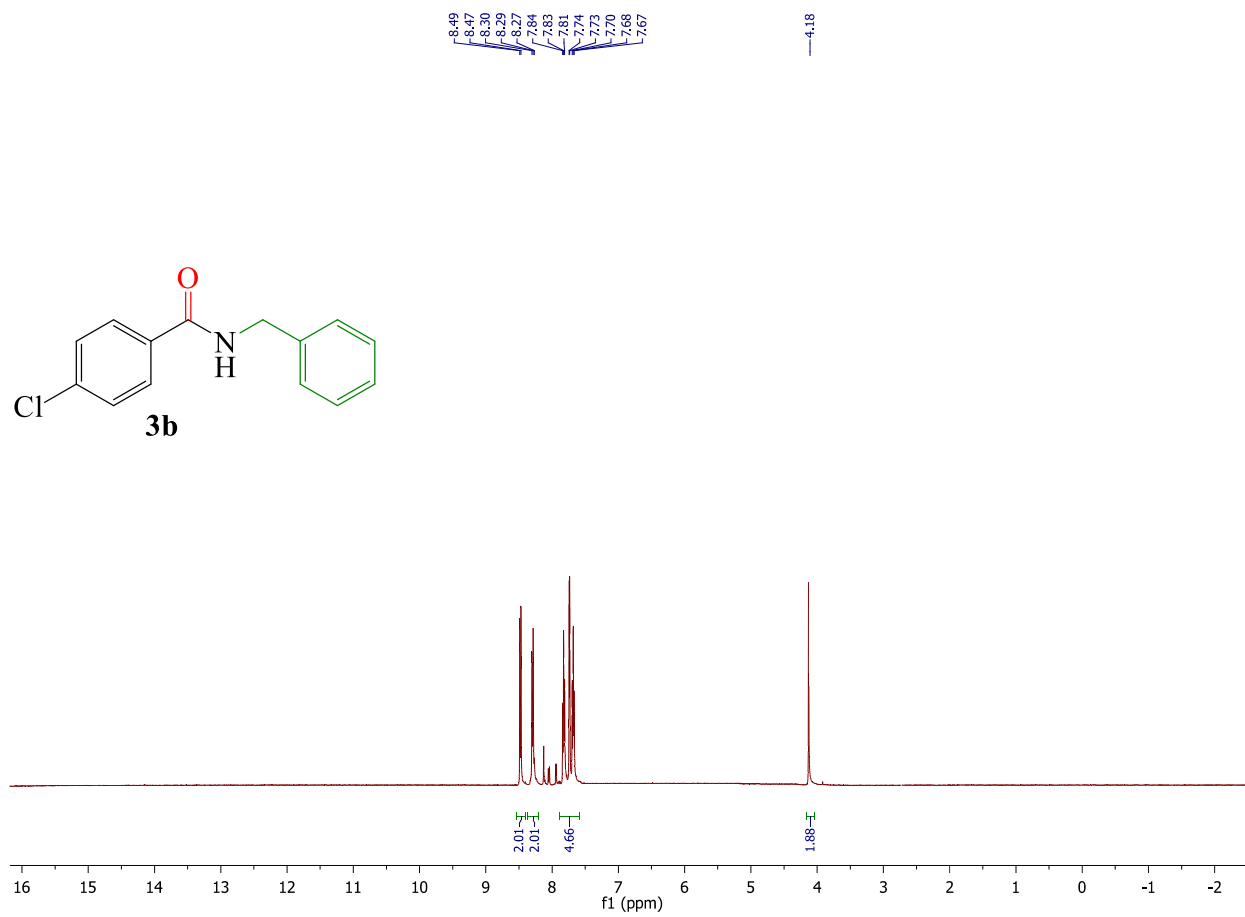

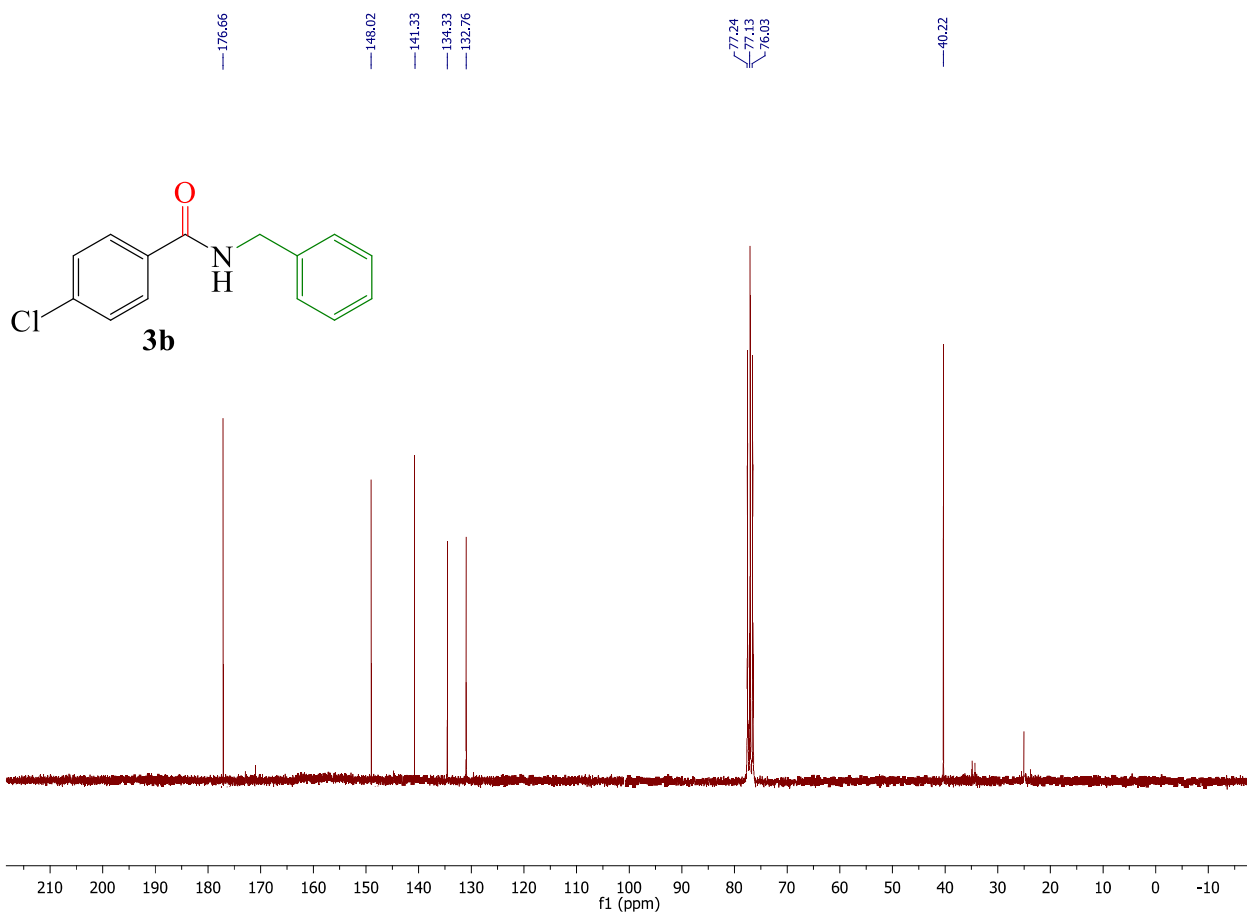

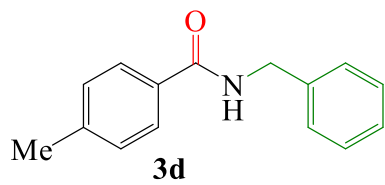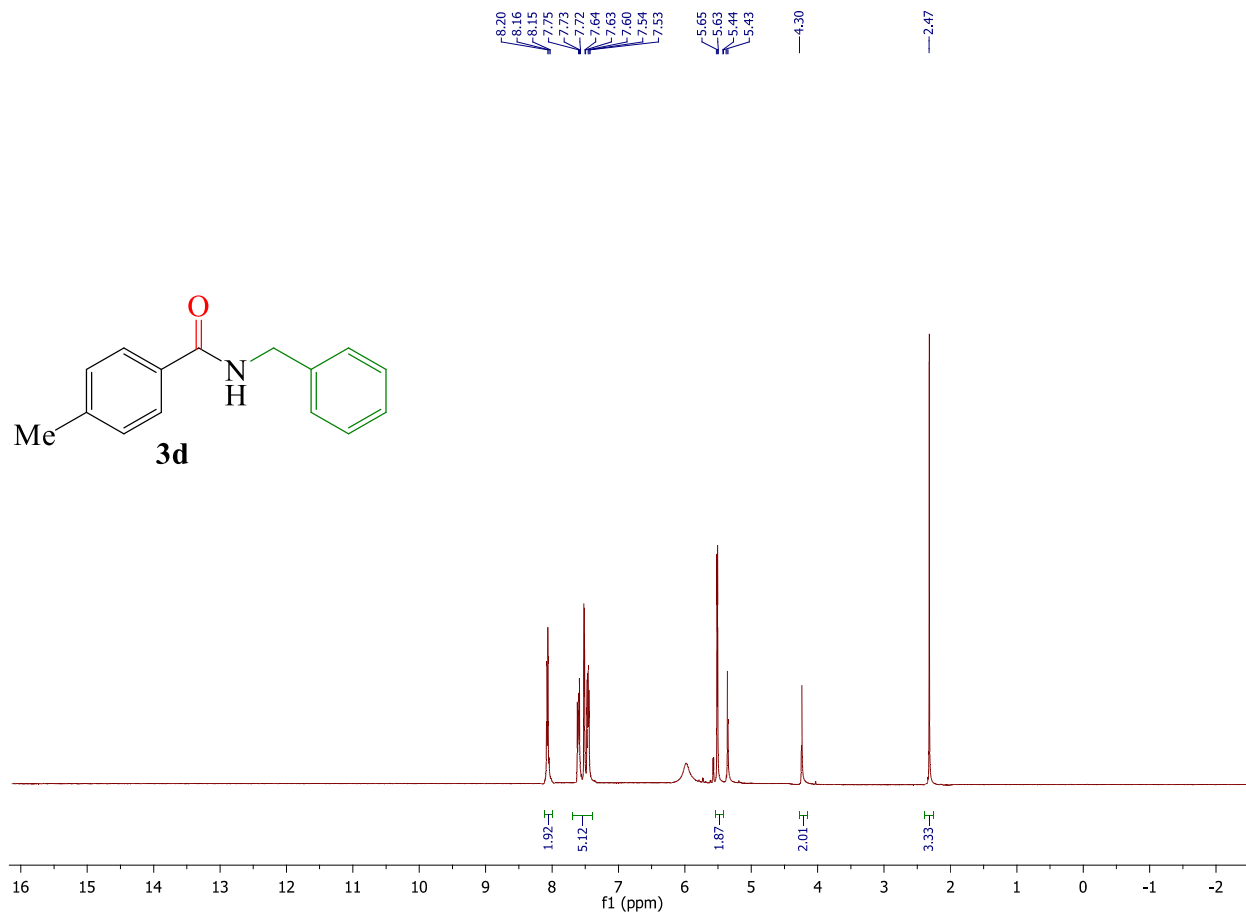

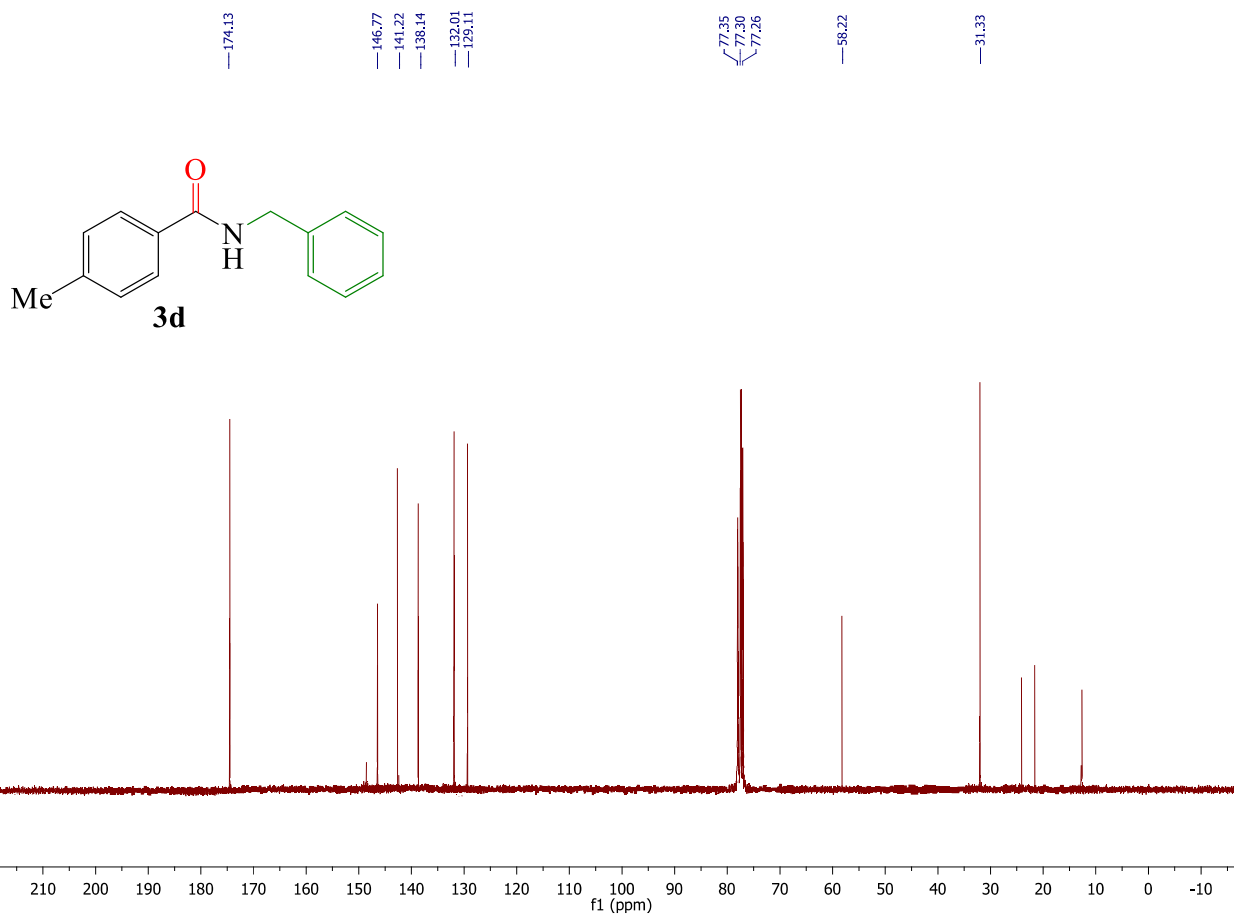

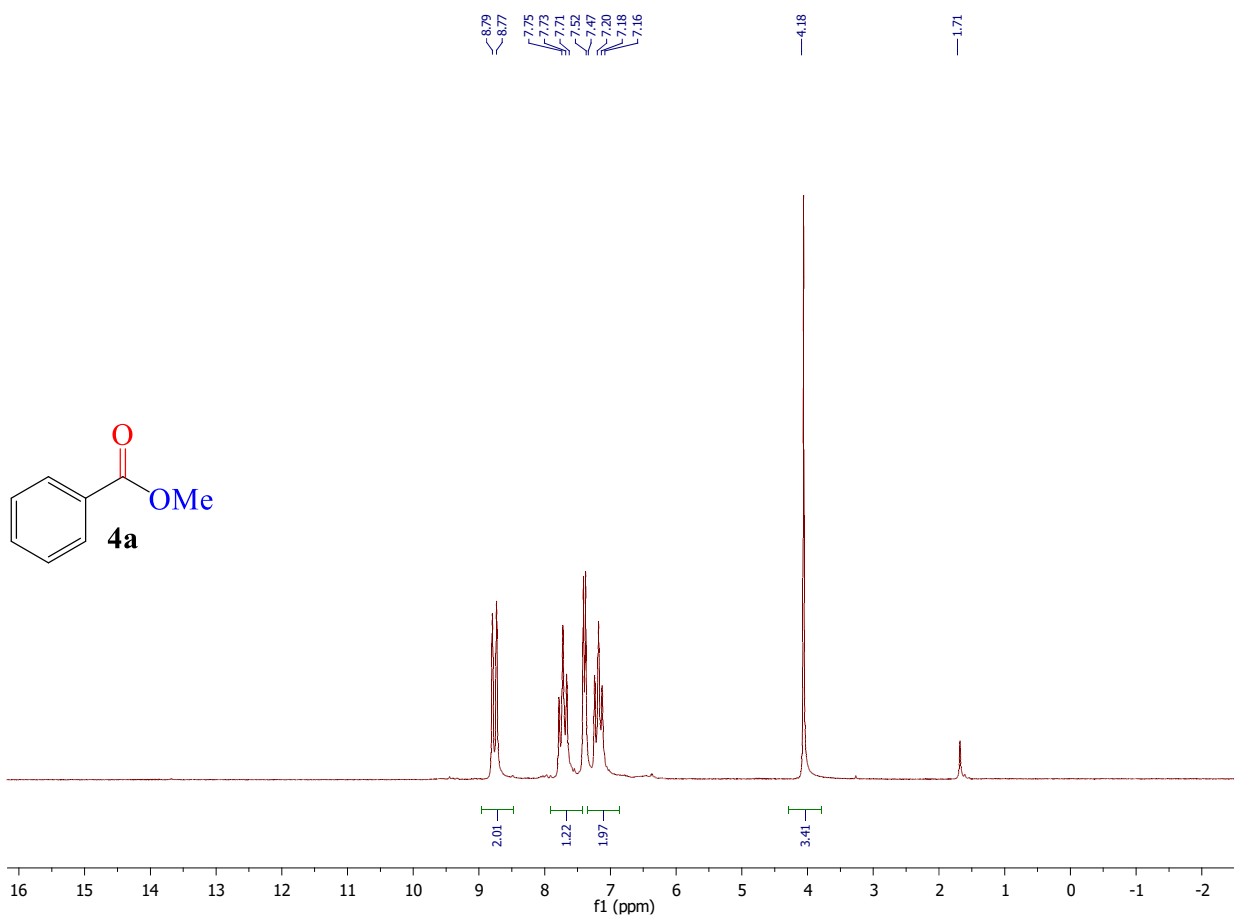

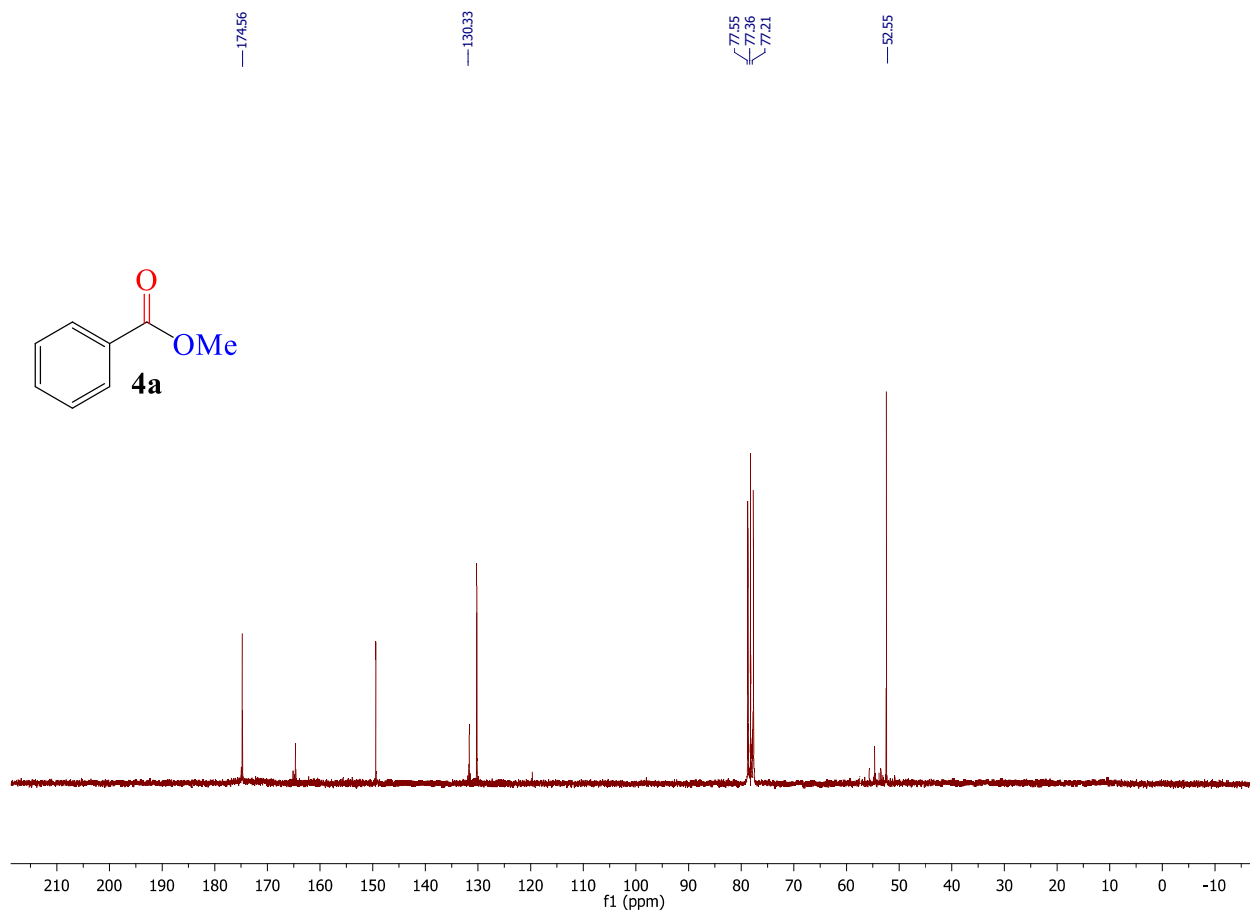

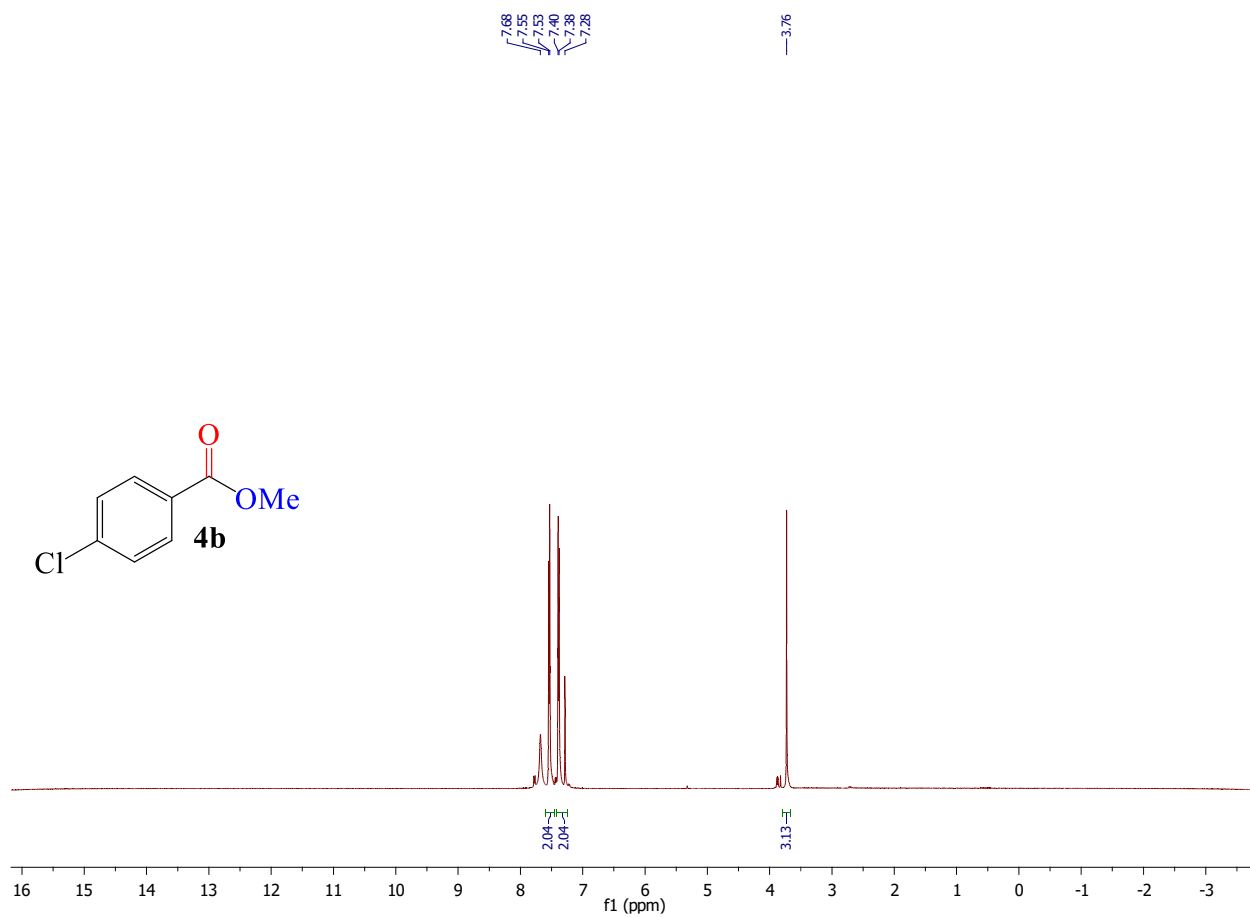



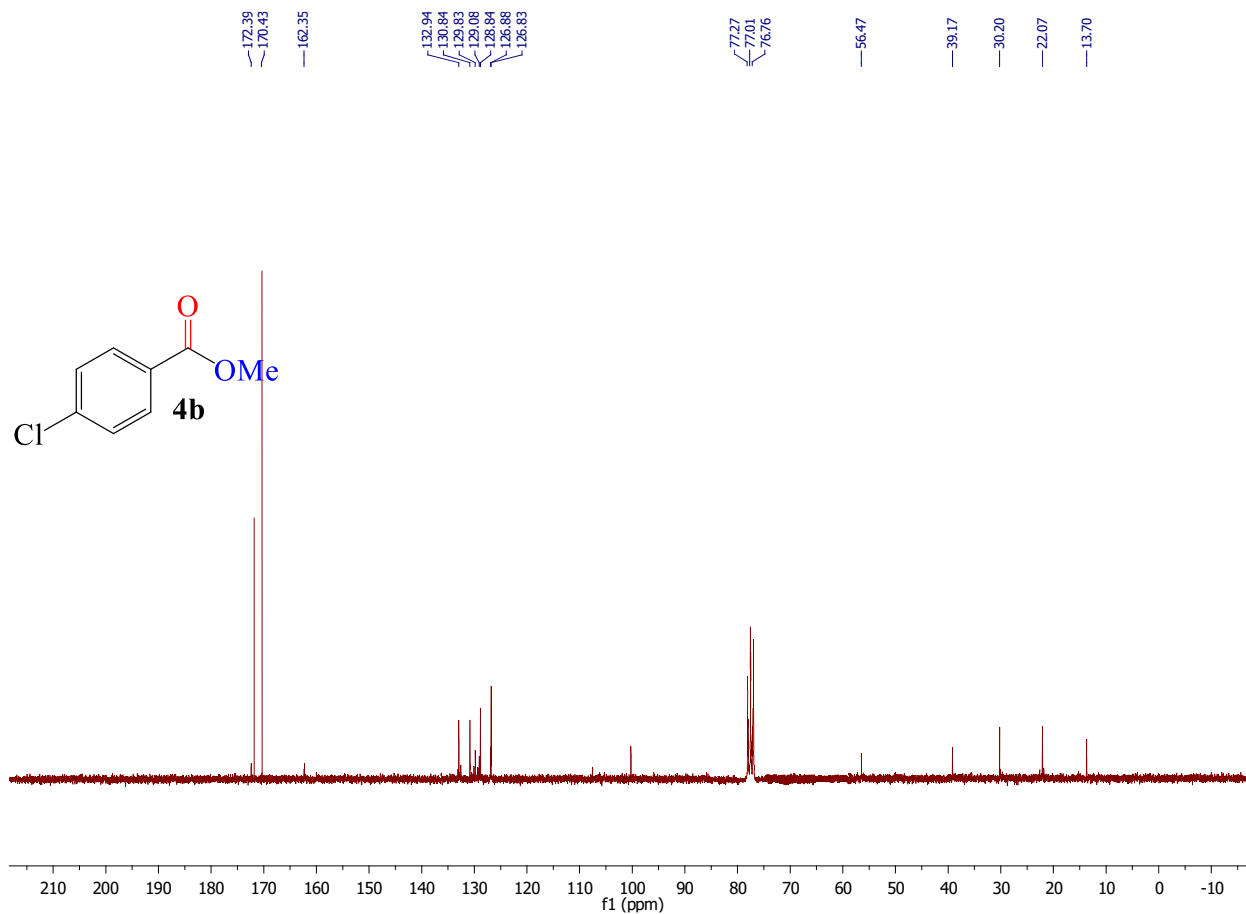

Supplement: d1ra05177f1.pdf [file d1ra05177f1.pdf]
